# Supplementary material
Source: PubMed Central journal article supplement (PMC9685722)

**Supplemental Figure 1. Meta-analysis forest plots of selected associations between herbicide use and risk of all non-Hodgkin lymphoma (NHL) and NHL subtypes (individual-study estimates are odds ratios (OR) and 95% confidence intervals (CI) from logistic regression models, with adjustment for study center, age, gender, socioeconomic status (SES), race/ethnicity, and set of covariates for use of other pesticides; meta-OR (overall) estimates are from random effects meta-analysis). NHL Subtypes: DLBCL=diffuse large B-cell lymphoma; FL=follicular lymphoma; MM=multiple myeloma; OBCL=other B-cell lymphoma; TCL=T-cell lymphoma.**

**Any herbicide use, all NHL**

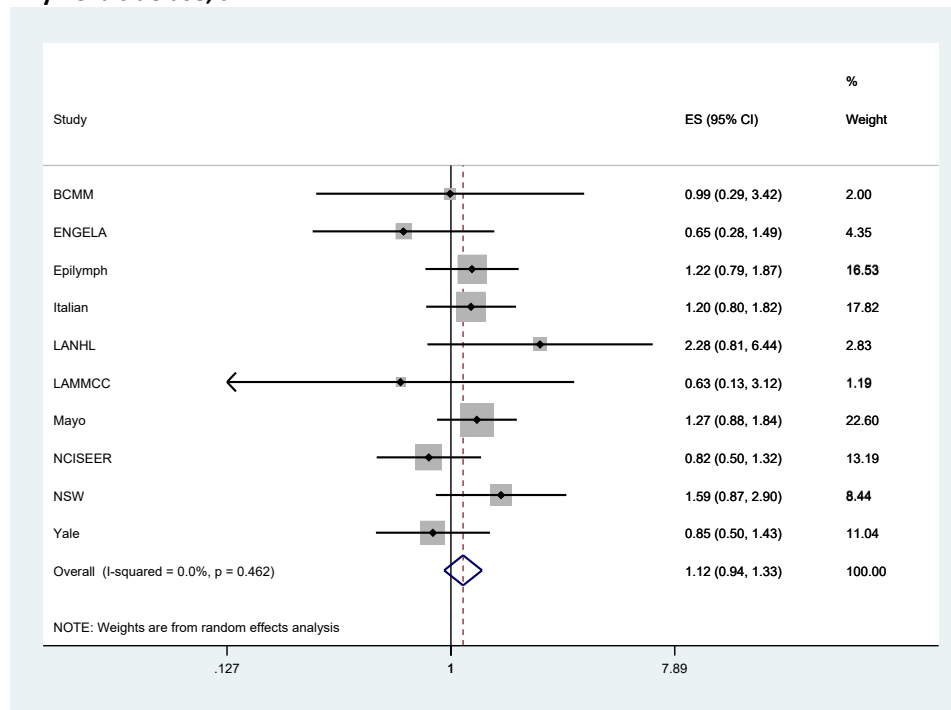

**Any herbicide use TCL**

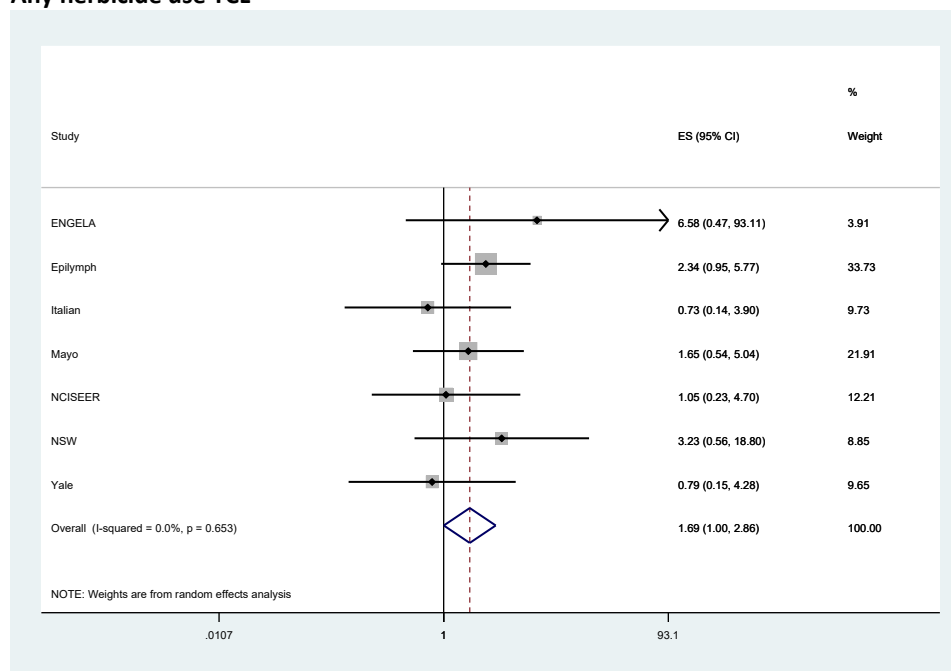

**Phenoxy herbicide use, all NHL**

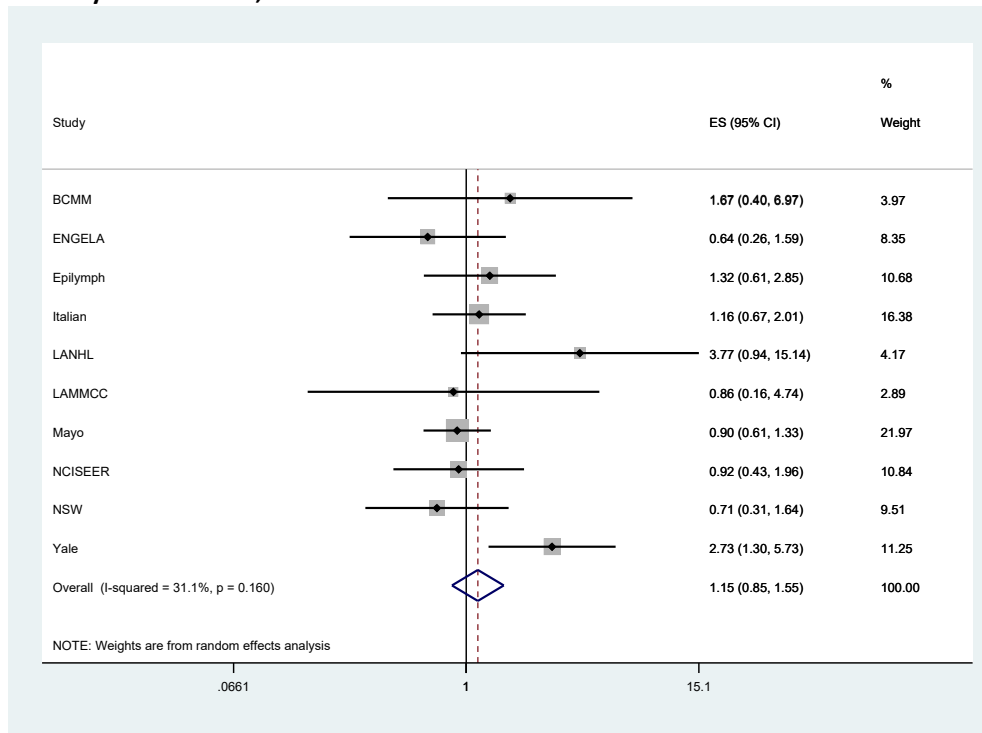

**Phenoxy herbicide use duration >8 years, all NHL**

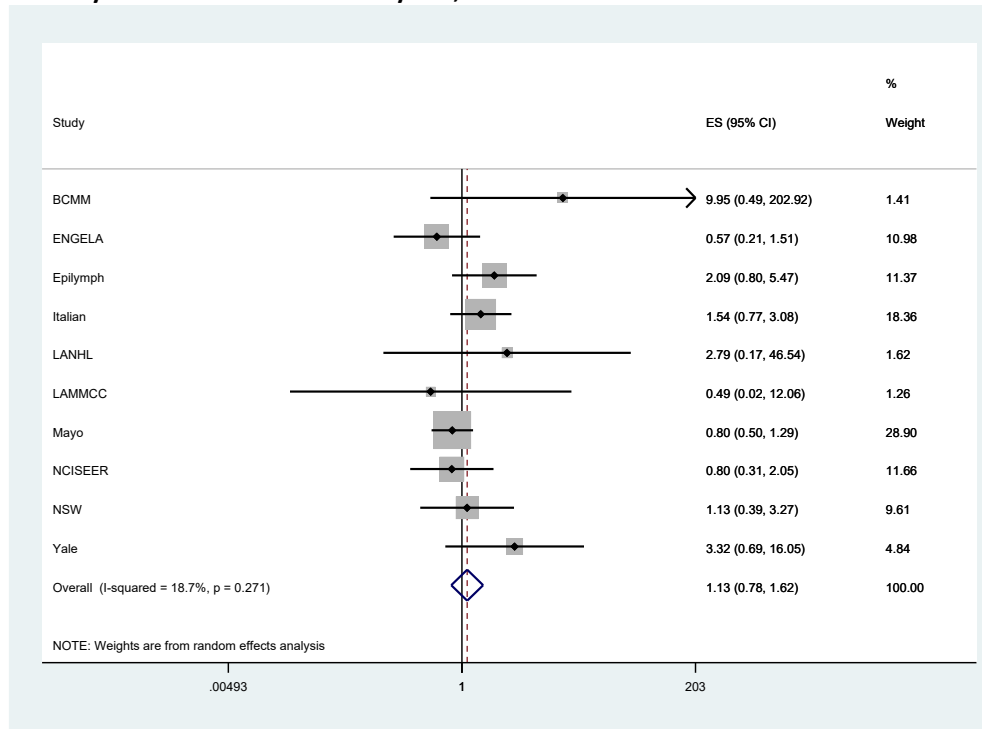

**Phenoxy herbicide use, MM**

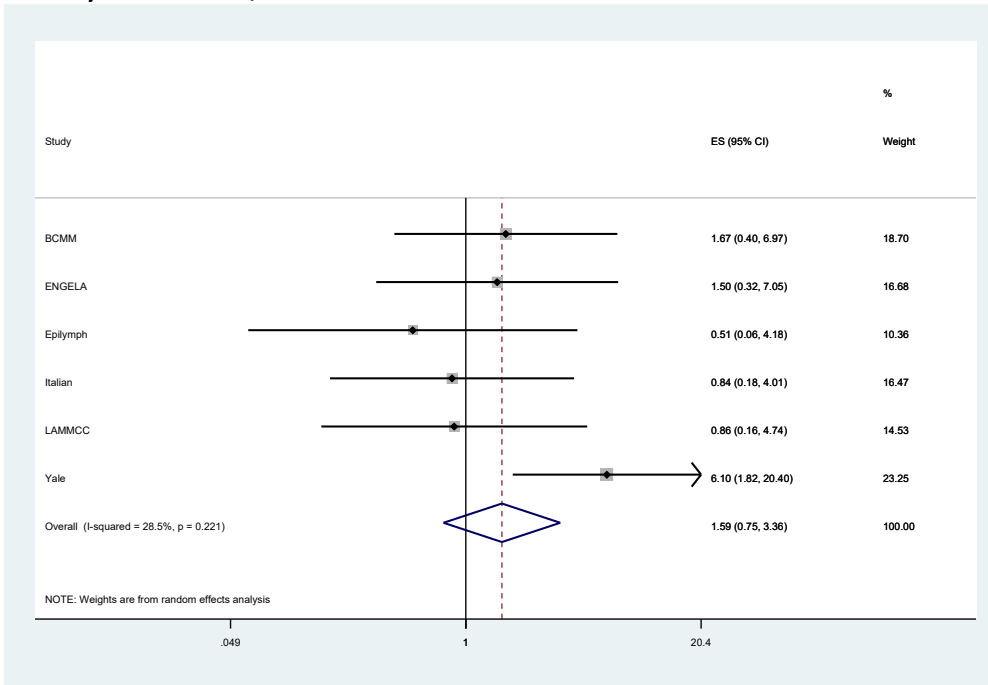

**Phenoxy herbicide use duration >8 years, MM**

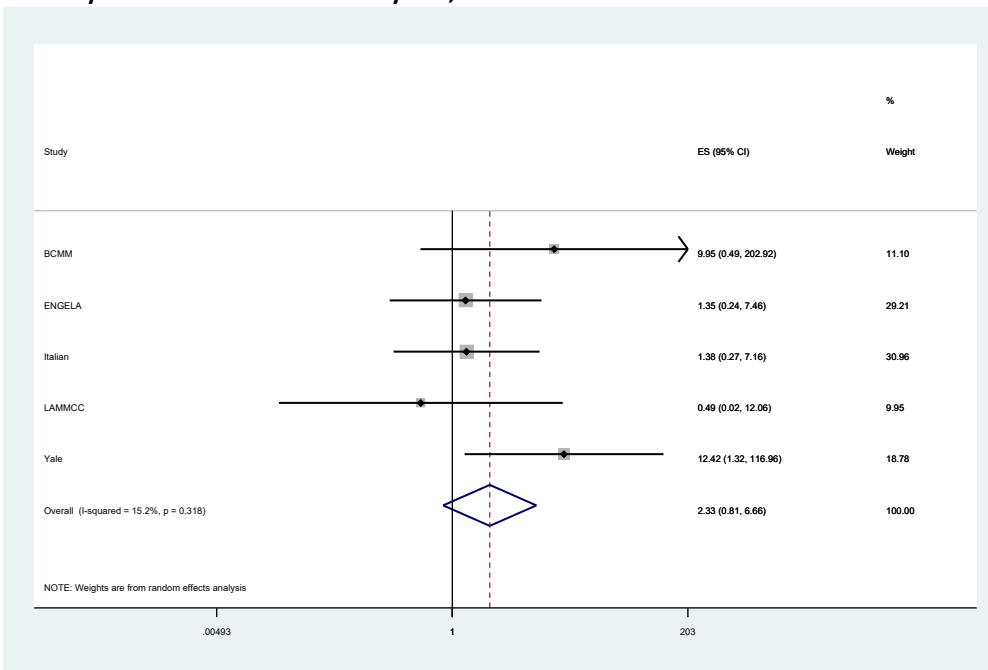

**2,4-D use, all NHL**

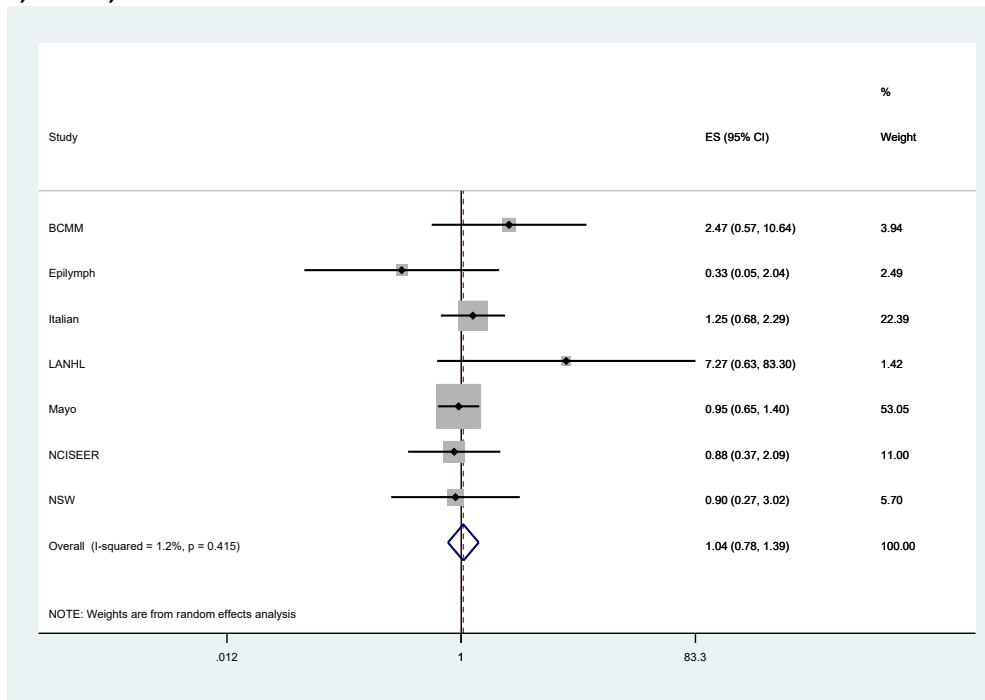

**2,4-D use duration >8 years, all NHL (BCMM excluded due to 0% weight)**

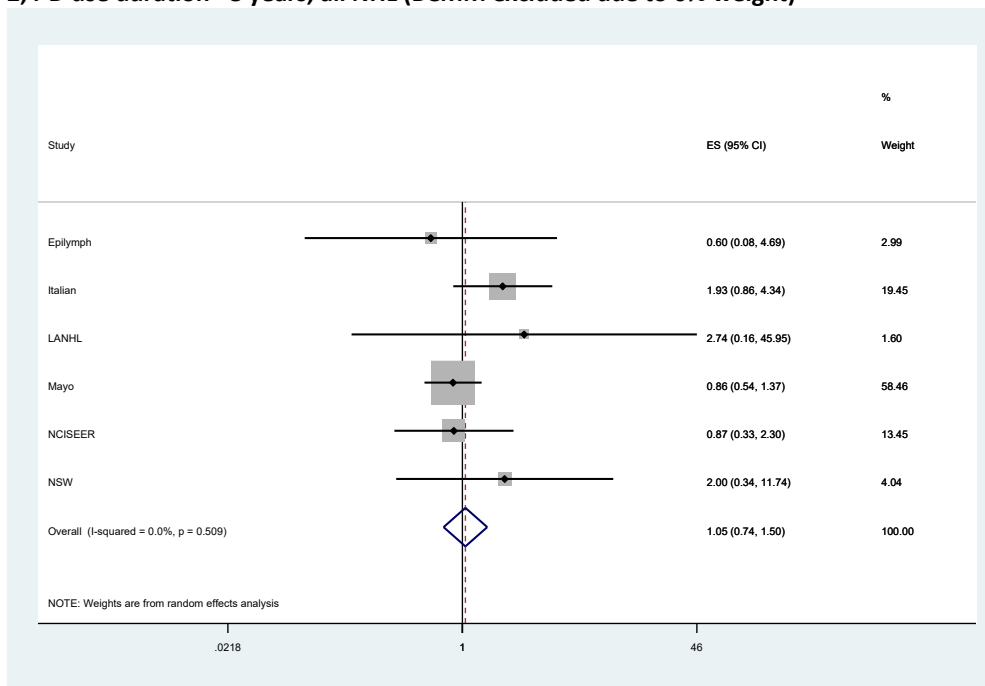

**2,4-D use duration >8 years, DLBCL**

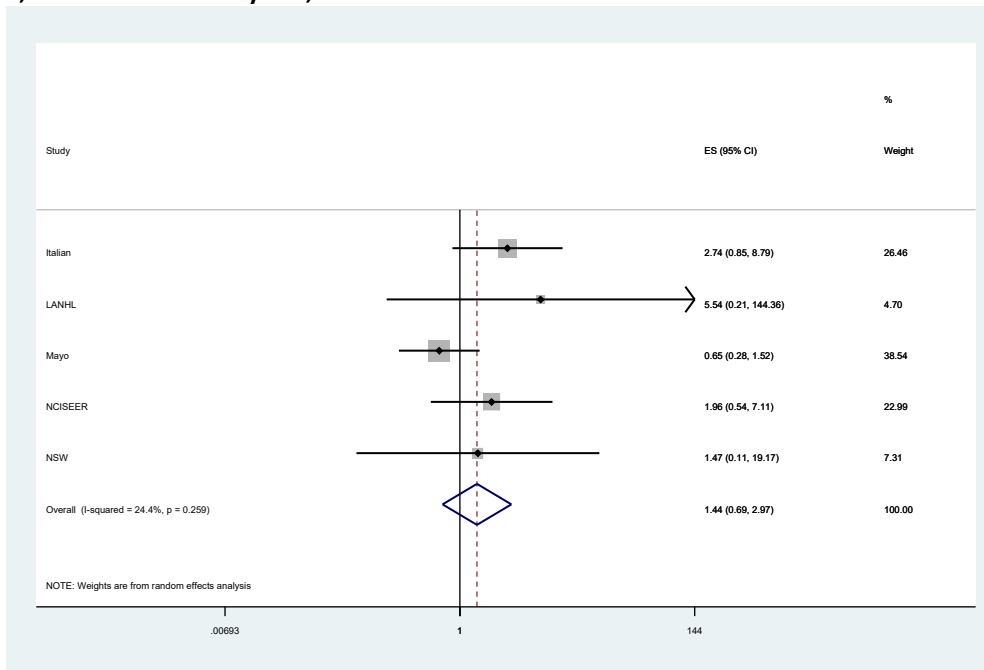

**2,4-D use duration >8 years, OBCL**

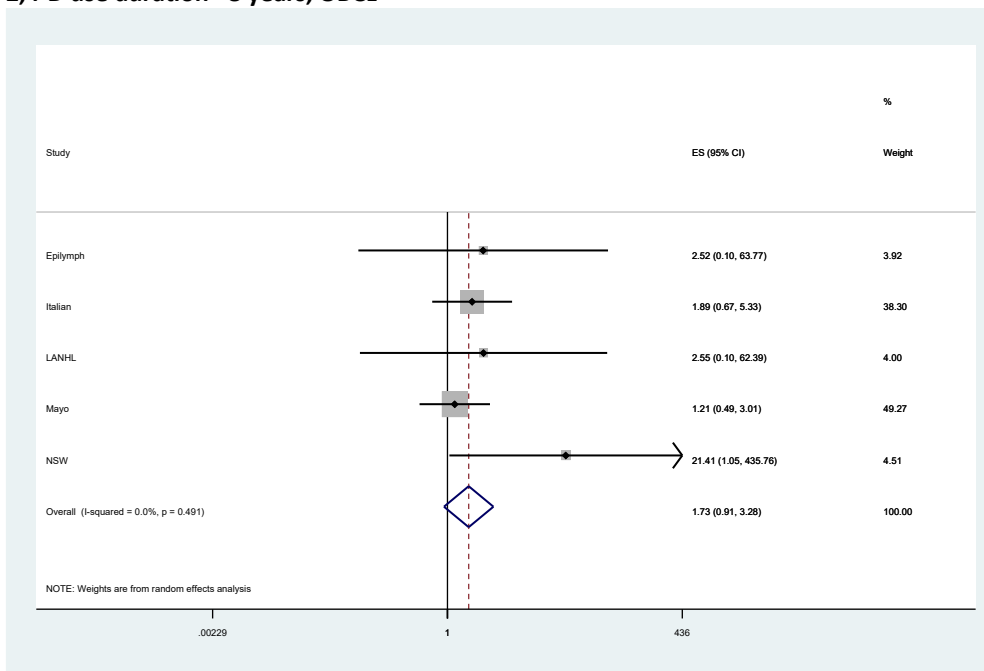

**Glyphosate use, all NHL**

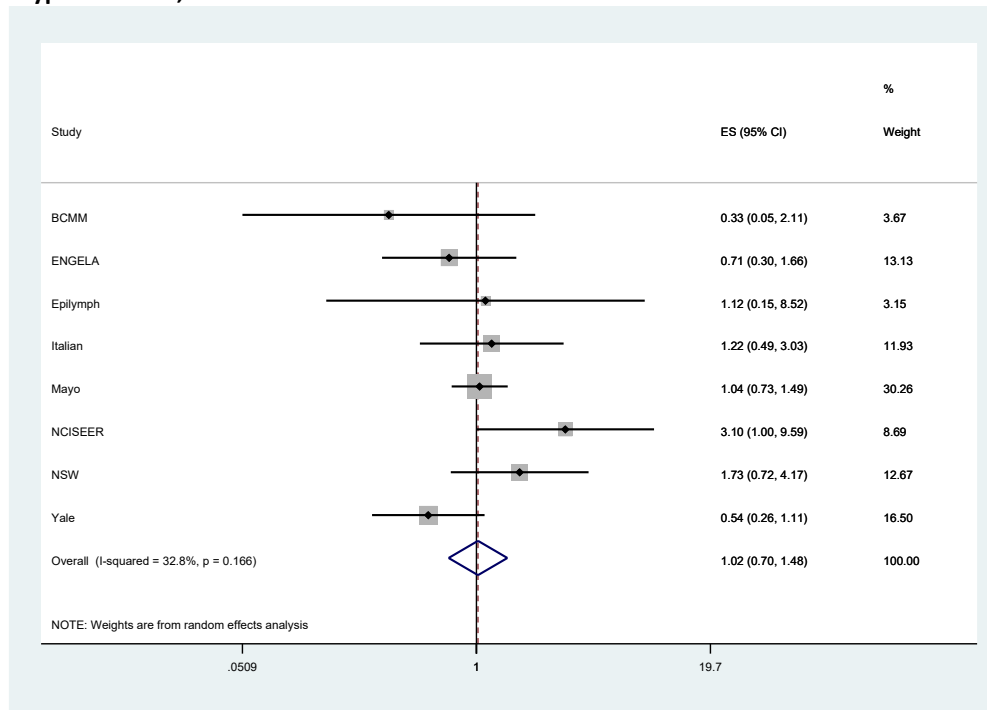

**Glyphosate lagged-use (10-year lag), all NHL**

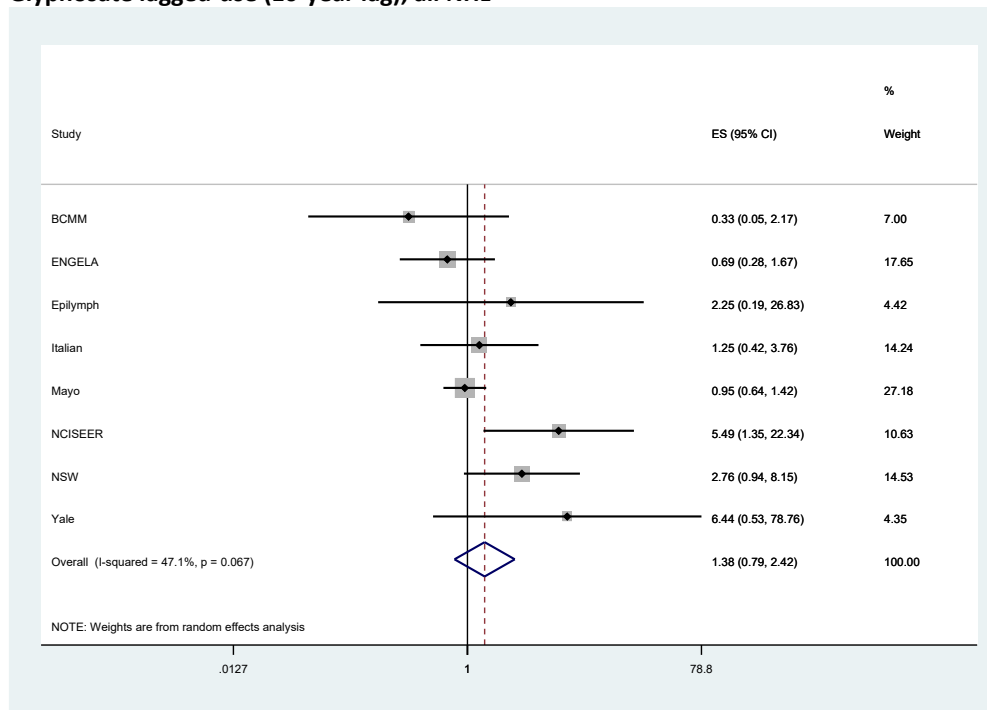

### Glyphosate use, FL

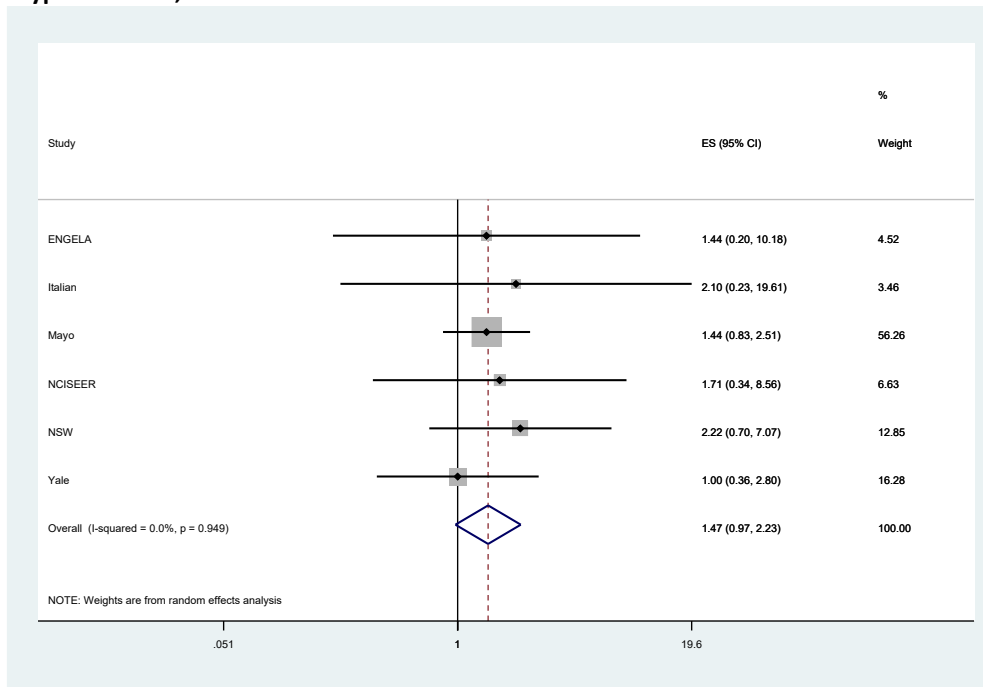

### Glyphosate lagged-use (10-year lag), FL

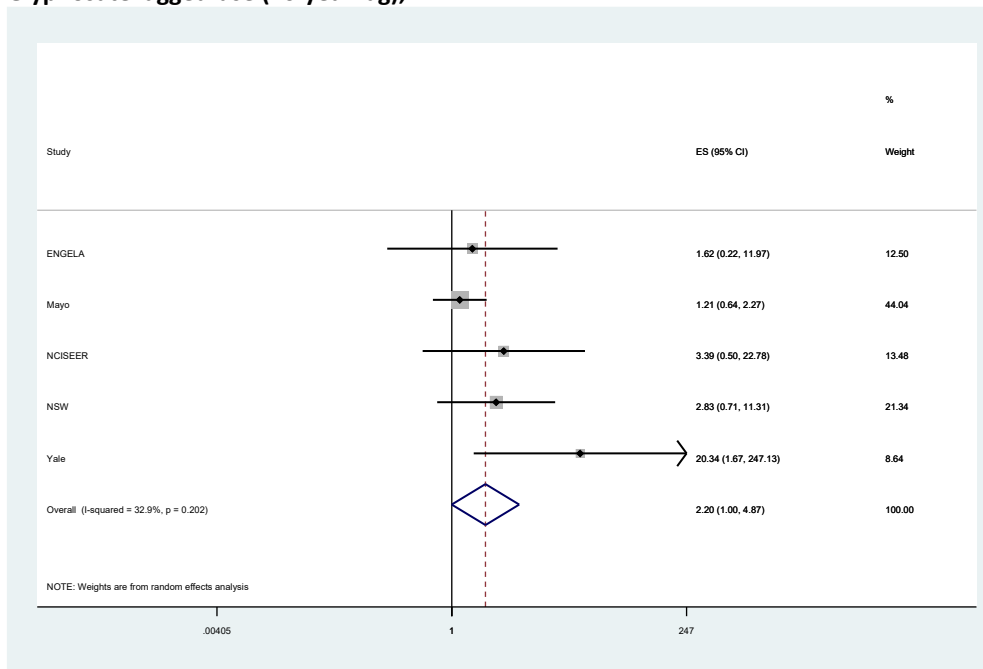

**Glyphosate lagged-use (10-year lag) duration ≤8 years, FL (NCISEER excluded due to 0% weight)**

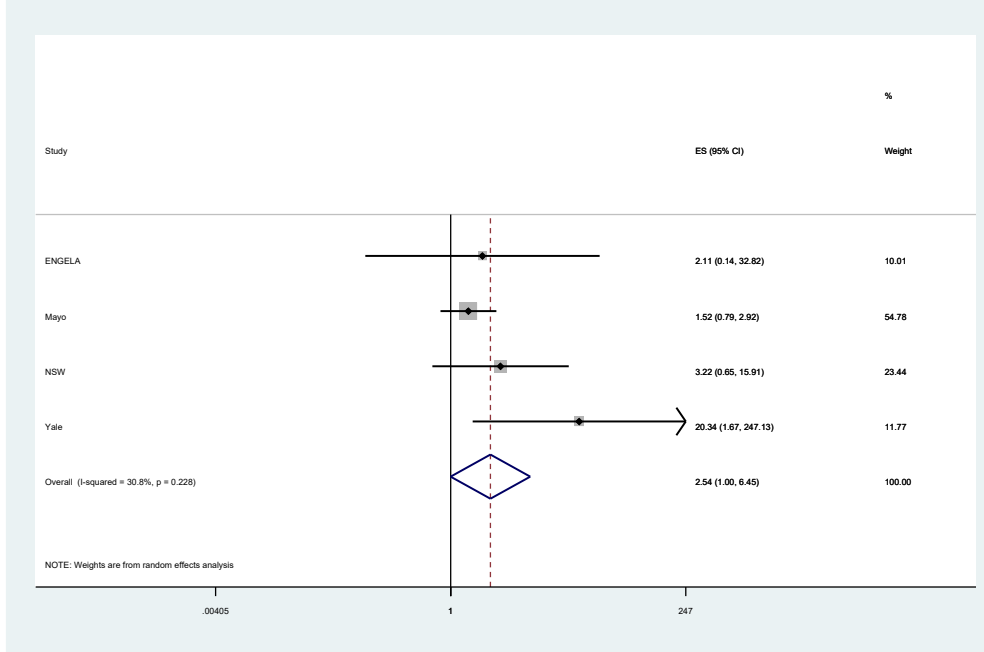

**Glyphosate lagged-use (10-year lag) duration >8 years, FL**

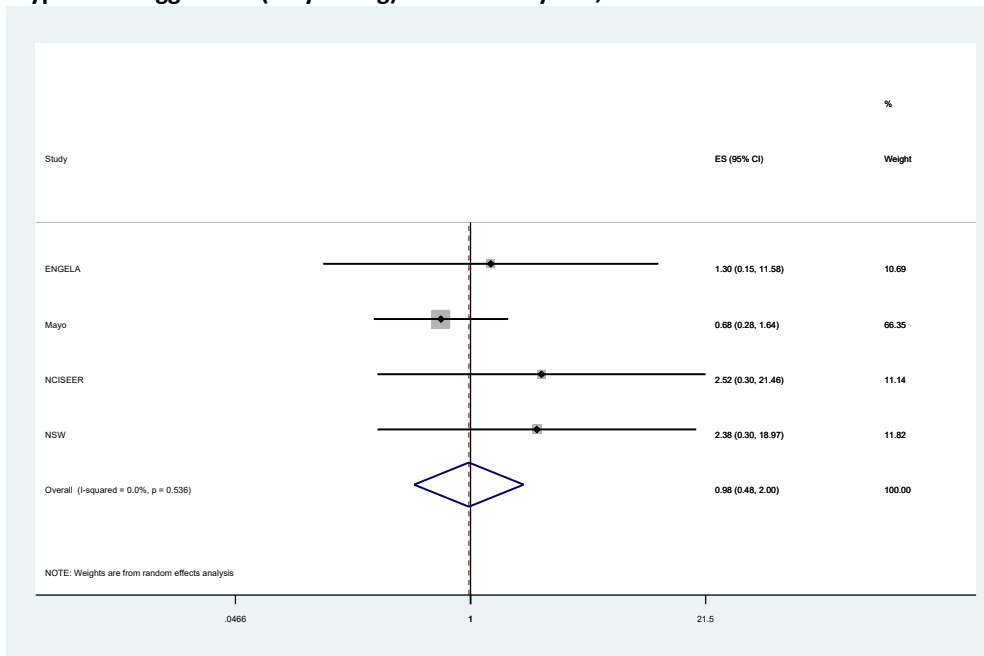



**Glyphosate lagged-use (10-year lag), DLBCL**

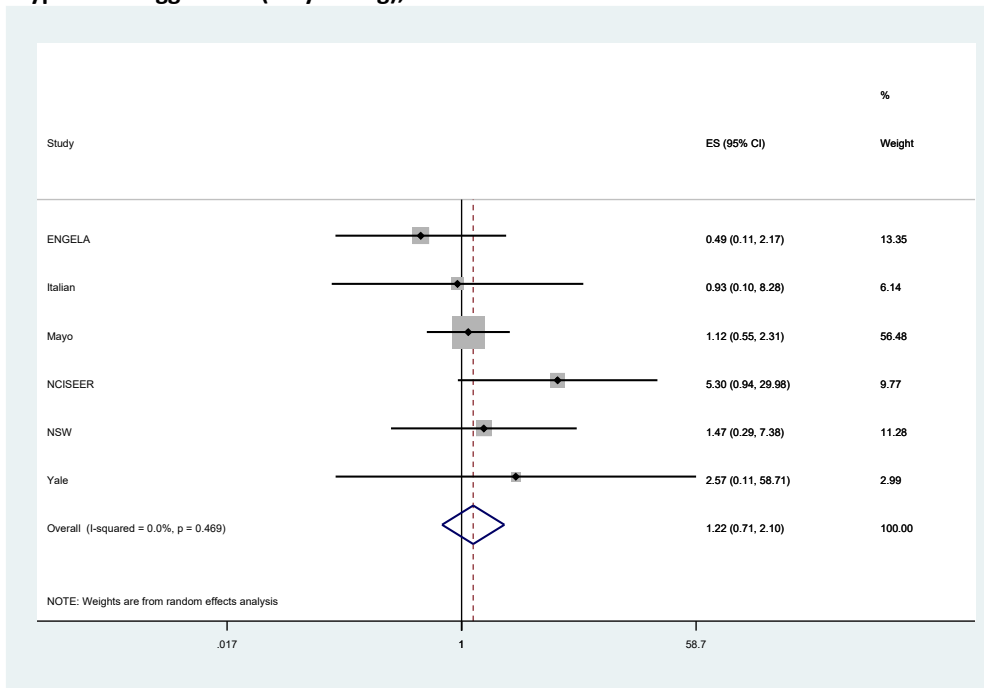

**Glyphosate lagged-use (10-year lag), TCL**

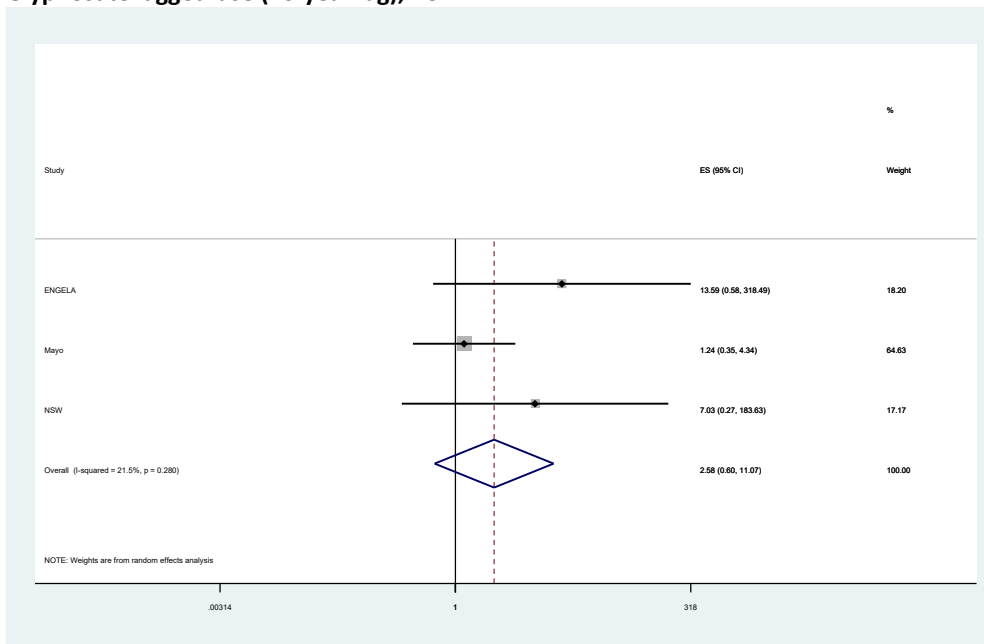

Supplement: oemed-2022-108371supp007.pdf [file oemed-2022-108371supp007.pdf]
