# Supplementary material
Source: PubMed Central journal article supplement (PMC9685722)
Supplement: oemed-2022-108371supp002.pdf [file oemed-2022-108371supp002.pdf]

## **Supplemental Material 2 – Adjustment for other occupational pesticide use in the InterLymph pooled analysis of herbicides**

Adjustment for other pesticides included up to 5 covariates for each herbicide group or active ingredient, selected and coded specifically for each herbicide. Because of associations we found with insecticide use in our previous pooled analysis, we adjusted for use of organophosphate insecticides and organochlorine insecticides using two separate indicator variables. Because of a priori hypotheses about associations of phenoxy herbicides and glyphosate with NHL, we adjusted for these herbicides using two indicator variables in each model (except for the models estimating associations with those particular herbicides). Estimated effects of 2,4-D and other phenoxy herbicide use were adjusted for each other (i.e., model for 2,4-D included indicator variable for other phenoxy herbicides, and vice versa). Finally, to capture use of any other type of pesticide including other insecticides, herbicides, fungicides, nematocides, etc., we developed an indicator variable tailored to each particular herbicide exposure (leaving that herbicide exposure out).
