# Supplementary material
Source: PubMed Central journal article supplement (PMC9685722)
Supplement: oemed-2022-108371supp003.pdf [file oemed-2022-108371supp003.pdf]

**Supplemental Table 1. Frequency of occupational herbicide use among controls within each of the case-control studies participating in the InterLymph pooled analysis**

|                          | BCMM      | ENGELA         | Epilymph  | Italian   | LAMMCC   | LANHL    | Mayo        | NCISEER   | NSW       | Yale      |
|--------------------------|-----------|----------------|-----------|-----------|----------|----------|-------------|-----------|-----------|-----------|
| Any herbicide            | 13 (3.5%) | 42 (9.4%)      | 48 (2.0%) | 59 (5.2%) | 4 (1.4%) | 6 (1.6%) | 296 (13.6%) | 51 (5.2%) | 33 (4.8%) | 44 (6.2%) |
| Phenoxy herbicides       | 5 (1.4%)  | 25 (5.6%)      | 13 (0.5%) | 29 (2.5%) | 3 (1.1%) | 3 (0.8%) | 239 (11.0%) | 17 (1.7%) | 18 (2.6%) | 18 (2.6%) |
| 2,4-D                    | 4 (1.1%)  | - <sup>a</sup> | 5 (0.2%)  | 22 (1.9%) | -        | 1 (0.3%) | 235 (10.8%) | 14 (1.4%) | 6 (0.9%)  | -         |
| Other phenoxy herbicides | 2 (0.5%)  | -              | 3 (0.1%)  | 24 (2.1%) | 3 (1.1%) | 3 (0.8%) | 39 (1.8%)   | 6 (0.6%)  | 8 (1.2%)  | -         |
| Glyphosate               | 5 (1.4%)  | 24 (5.4%)      | 2 (0.1%)  | 9 (0.8%)  | -        | -        | 253 (11.6%) | 5 (0.5%)  | 14 (2.1%) | 28 (4.0%) |
| Triazine herbicides      | 1 (0.3%)  | 20 (4.5%)      | 10 (0.4%) | 18 (1.6%) | -        | -        | 161 (7.4%)  | 6 (0.6%)  | 4 (0.6%)  | -         |
| Atrazine                 | 1 (0.3%)  | -              | -         | 16 (1.4%) | -        | -        | 154 (7.1%)  | 5 (0.5%)  | 2 (0.3%)  | -         |
| Amide herbicides         | -         | 12 (2.7%)      | -         | 11 (1.0%) | -        | -        | 141 (6.5%)  | 6 (0.6%)  | 1 (0.2%)  | -         |
| Alachlor                 | -         | -              | -         | 4 (0.4%)  | -        | -        | 119 (5.5%)  | 3 (0.3%)  | -         | -         |
| Trifluralin              | 0         | -              | -         | 21 (1.8%) | -        | -        | 112 (5.1%)  | 7 (0.7%)  | 0         | 8 (1.1%)  |
| Dicamba                  | 1 (0.3%)  | -              | -         | 5 (0.4%)  | -        | 1 (0.3%) | 121 (5.5%)  | 2 (0.2%)  | 1 (0.2%)  | -         |
| Pendimethalin            | -         | -              | -         | 4 (0.4%)  | -        | -        | 52 (2.4%)   | 1 (0.1%)  | -         | -         |
| Paraquat                 | 1 (0.3%)  | -              | -         | 4 (0.4%)  | -        | -        | 17 (0.8%)   | 1 (0.1%)  | 3 (0.4%)  | -         |

<sup>a</sup> The symbol " - " indicates that the study was not included in analysis of the particular herbicide, due to no exposed cases or controls
